# Supplementary material for: High-speed three-dimensional photoacoustic computed tomography for preclinical research and clinical translation
Source: Springer Nature journal article supplement (doi:10.1038/s41467-021-21232-1), 2021-02-09
Supplement: MOESM3 [file 41467_2021_21232_MOESM3_ESM.pdf]

## **Description of Additional Supplementary Files**

**Supplementary Movie 1.** Volumetric image of a rat brain *in vivo*, showing detailed angiographic structures from the cortex to the Circle of Willis. Scale bars: 2 mm.

**Supplementary Movie 2.** Volumetric images of the rat brain: (I) intrinsic functional connectivity across spatially separated brain regions; (II) cortical hemodynamics in response to electrical stimulation to the front limbs.

**Supplementary Movie 3.** Volumetric image of the right human breast (cup 36C) *in vivo*, revealing blood vessels as deep as 4 cm. The image was acquired within a single breath hold of 10 seconds. Scale bars: 5 mm.

**Supplementary Movie 4.** Volumetric image of the left human breast *in vivo*. Scale bars: 5 mm.
